# Supplementary material for: Comparing chemical composition and lignin structure of Miscanthus x giganteus and Miscanthus nagara harvested in autumn and spring and separated into stems and leaves
Source: Royal Society of Chemistry journal article supplement (doi:10.1039/c9ra10576j), 2020-01-01
Supplement: c9ra10576j1.pdf [file c9ra10576j1.pdf]

## Electronic Supplement Information (ESI)

### Comparing Chemical Composition and Lignin Structure of *Miscanthus x giganteus* and *Miscanthus nagara* Harvested in Autumn and Spring and Separated into Stem and Leaves

Michel Bergs, Xuan Tung Do, Jessica Rumpf, Peter Kusch, Yulia Monakhova, Christopher Konow, Georg Völkerling, Ralf Pude and Margit Schulze\*

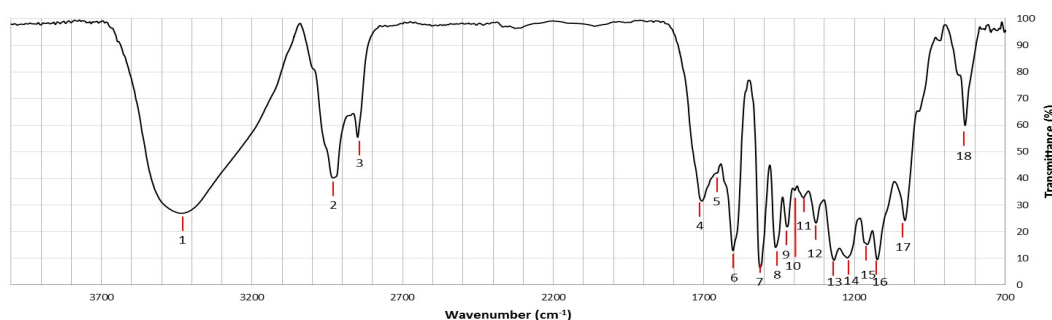

**Figure S1.** FT-IR spectrum of stem-derived lignin obtained from *M. x giganteus* (Gig35S), harvested in April with numbered signals listed in Table A2.

**Tab. S1** FTIR signals and corresponding assignment for lignins isolated from *M. x giganteus* (Gig35, stem and leaf) and *M. nagara* (NagG10, stem and leaf). See Fig. S1 for signal numbering.

| Signal Number | Wave Number (cm <sup>-1</sup> ) | Functional Group         | Type of Vibration                  |
|---------------|---------------------------------|--------------------------|------------------------------------|
| 1             | 3428±60                         | O-H-                     | Stretch                            |
| 2             | 2926±11                         | C-H-                     | Stretch                            |
| 3             | 2850±6                          | C-H-                     | Stretch                            |
| 4             | 1708±11                         | C=O-                     | Stretch                            |
| 5             | 1655±4                          | C=O-                     | Stretch                            |
| 6             | 1605±12                         | Aromatic Ring            | Symmetric Stretch                  |
| 7             | 1514±6                          | Aromatic Ring            | Antisymmetric Stretch              |
| 8             | 1460±4                          | C-H-                     | Antisymmetric Deformation          |
| 9             | 1424±4                          | C-H in O-CH <sub>3</sub> | Antisymmetric Deformation (S-Mode) |
| 10            | 1398±4                          | C-H                      | Bending                            |
| 11            | 1371±15                         | Aromatic frame           | C-H in-plane Deformation           |
| 12            | 1331±9                          | Aromatic frame; C-O      | Skeletal; Stretch (S-Mode)         |
| 13            | 1267±2                          | Aromatic frame; C-O      | Skeletal; Stretch (G-Mode)         |
| 14            | 1225±12                         | C-C; C-O; C=O            | Stretch (G-Mode)                   |
| 15            | 1166±10                         | C-H in G-Ring            | Stretch                            |
| 16            | 1124±2                          | Aromatic C-H             | In-plane Deformation               |
| 17            | 1033±2                          | Aromatic C-H             | In-plane Deformation               |
| 18            | 834±4                           | Aromatic C-H             | Out-of-plane Deformation (S-Mode)  |

**Tab. S2** SEC results (detected via refractive index (RI) and ultraviolet (UV) detectors) including the number average ( $M_n$ ) and weight average ( $M_w$ ) molecular weight and polydispersity (PDI) of lignin obtained from *M. x giganteus* and *M. nagara*, resp., separated into leaves (Gig35L, NagG10L) and stems (Gig35S, NagG10S).

| Sample  | Harvesting | Detector | $M_n$ (g mol <sup>-1</sup> ) | $M_w$ (g mol <sup>-1</sup> ) | PDI  |
|---------|------------|----------|------------------------------|------------------------------|------|
| Gig35L  | September  | RI       | 910.01                       | 1746.8                       | 1.92 |
|         |            | UV       | 882.6                        | 1747.1                       | 1.98 |
|         | December   | RI       | 884.95                       | 1720.6                       | 1.94 |
|         |            | UV       | 876.93                       | 1678.8                       | 1.91 |
|         | April      | RI       | 994.95                       | 1796.6                       | 1.81 |
|         |            | UV       | 960.46                       | 1757.4                       | 1.83 |
| NagG10L | September  | RI       | 915.59                       | 1895.8                       | 2.07 |
|         |            | UV       | 900.93                       | 1922.3                       | 2.13 |
|         | December   | RI       | 832.81                       | 1637.3                       | 1.97 |
|         |            | UV       | 863.79                       | 1630.5                       | 1.89 |
|         | April      | RI       | 961.66                       | 1782.3                       | 1.85 |
|         |            | UV       | 951.22                       | 1766.9                       | 1.86 |
| Gig35S  | September  | RI       | 1178.7                       | 2143.1                       | 1.82 |
|         |            | UV       | 1089.4                       | 2047.6                       | 1.88 |
|         | December   | RI       | 1229.4                       | 2207.2                       | 1.8  |
|         |            | UV       | 1125.9                       | 2103.1                       | 1.87 |
|         | April      | RI       | 1298.2                       | 2312                         | 1.78 |
|         |            | UV       | 1197.5                       | 2241.6                       | 1.87 |
| NagG10S | September  | RI       | 1093.5                       | 1915.7                       | 1.75 |
|         |            | UV       | 980.61                       | 1821                         | 1.86 |
|         | December   | RI       | 1180                         | 2063                         | 1.75 |
|         |            | UV       | 1055.6                       | 1937.2                       | 1.84 |
|         | April      | RI       | 1251.6                       | 2127.5                       | 1.7  |
|         |            | UV       | 1115.8                       | 2053.3                       | 1.84 |

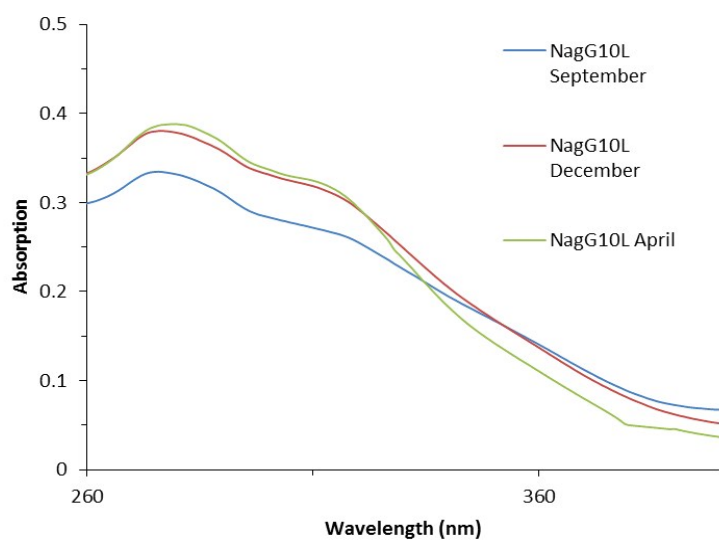

**Figure S2.** UV/Vis curves for lignins obtained from leaf-derived *M. nagara* (NagG10L) harvested in September, December and April.

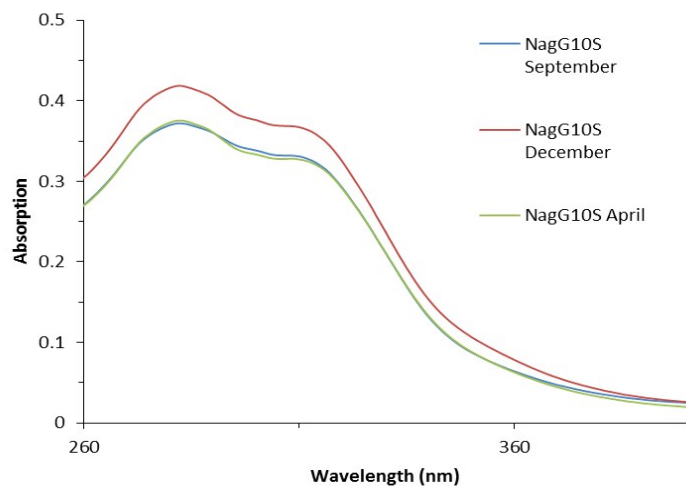

**Figure S3.** UV/Vis curves for lignins obtained from stem-derived *M. nagara* (NagG10S) harvested in September, December and April.

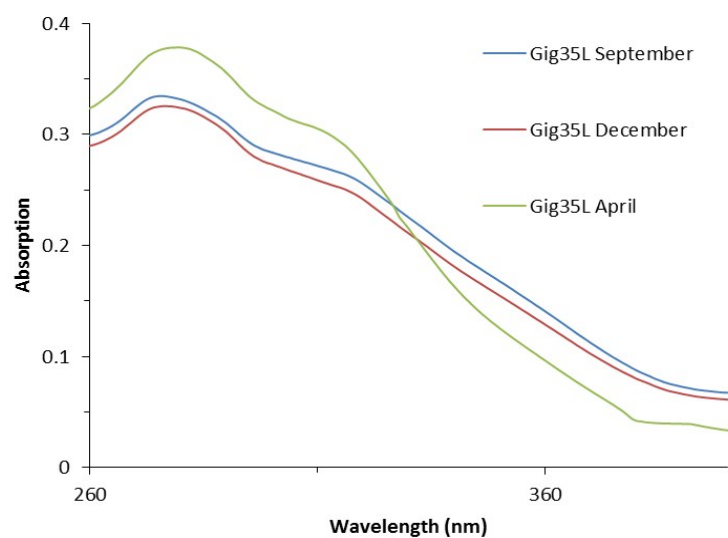

**Figure S4.** UV/Vis curves for lignins obtained from leaf-derived *M. x giganteus* (Gig35L) harvested in September, December and April.

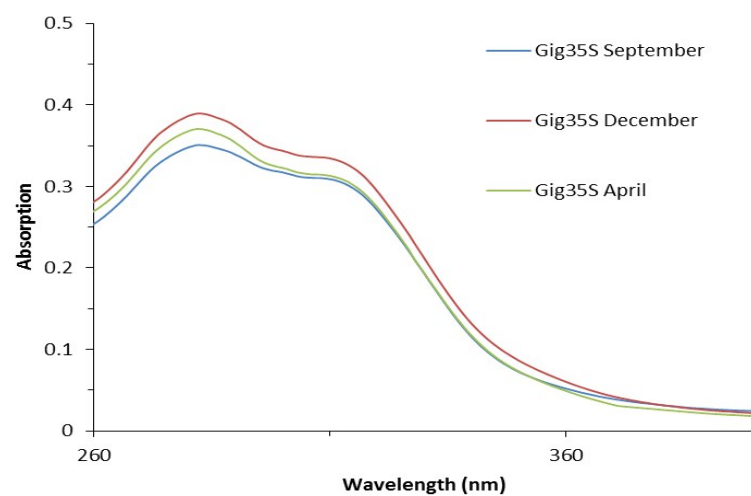

**Figure S5.** UV/Vis curves for lignins obtained from stem-derived *M. x giganteus* (Gig35S) harvested in September, December and April.

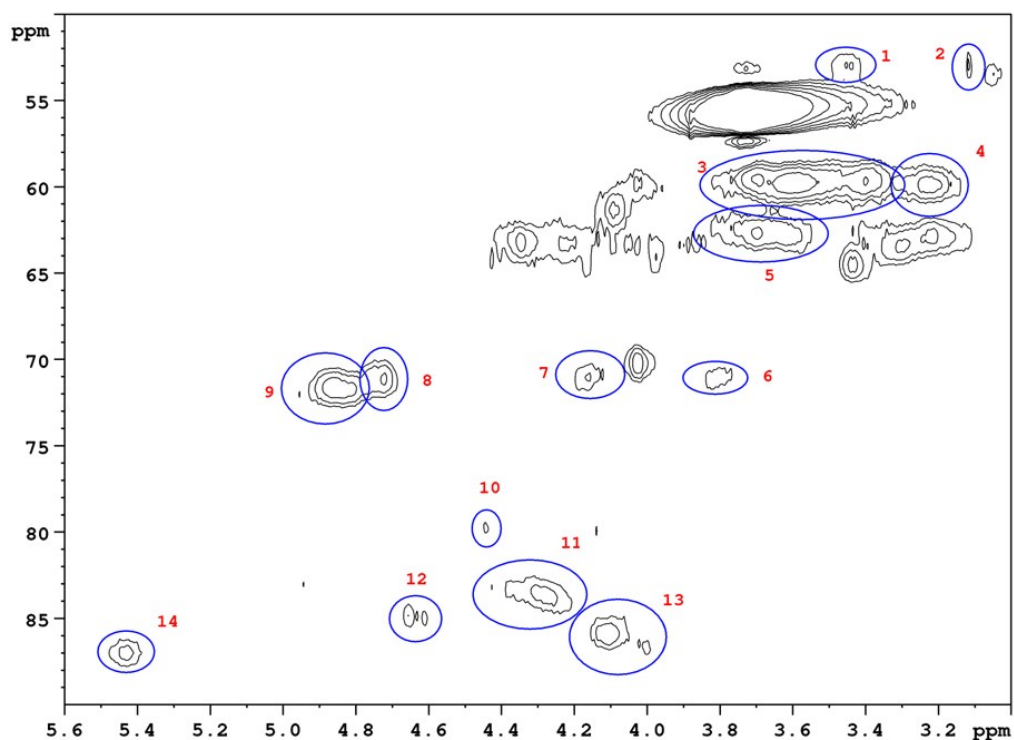

**Figure S6.** Non-Aromatic HSQC region of a lignin obtained from *M.x giganteus* (Gig35, stem, April harvest). Numbers are listed and assigned in the main text, Table 5.

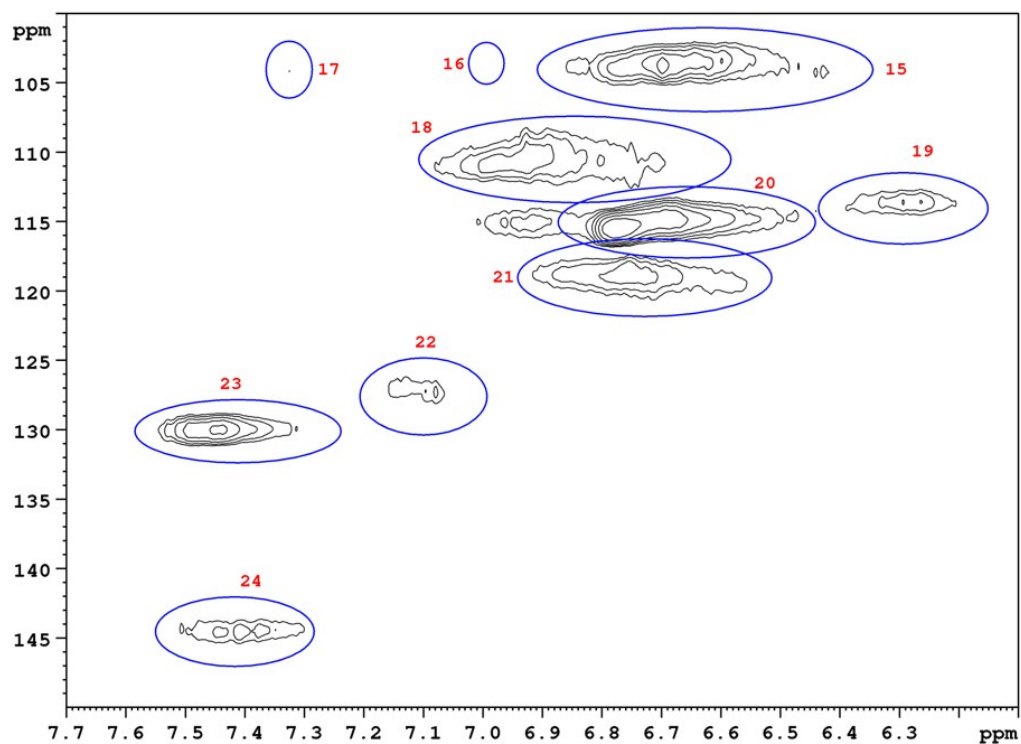

**Figure S7.** Non-Aromatic HSQC region of a lignin obtained from *M. x giganteus* (Gig35, stem, April harvest). Numbers are listed and assigned in the main text, Table 5.
